# Supplementary material for: The role of hydrogen bonding in tuning CEST contrast efficiency: a comparative study of intra- and inter-molecular hydrogen bonding
Source: Royal Society of Chemistry journal article supplement (doi:10.1039/d1nj04637c), 2021-12-08
Supplement: d1nj04637c1.pdf [file d1nj04637c1.pdf]

## The role of hydrogen bonding in tuning CEST contrast efficiency: A comparative study of intra and inter molecular hydrogen bonding

Shalini Pandey, † Subhayan Chakraborty, † Rimilmandrita Ghosh, Divya Radhakrishnan, S. Peruncheralathan\* and Arindam Ghosh\*

[a] School of Chemical Sciences, National Institute of Science Education and Research ,HBNI, At/PO Jatni, Khurda 752050 ,Odisha,India

Email: [peru@niser.ac.in](mailto:peru@niser.ac.in), [aringh@niser.ac.in](mailto:aringh@niser.ac.in)

### Table of Content

- **Figures S1.1 to S1.8:**  $^1\text{H}$  and  $^{13}\text{C}$  NMR spectra and characterization of compounds **1,2** and **3** in  $\text{DMSO-d}_6$ .
- **Figure S2.1:** Fitting Curve for determination  $T_2$  relaxation of buffer solution.
- **Figures S2.2-S2.4:** Fitting Curves for determination of solute concentration effect on the  $T_2$  relaxation time of buffer solution for  $N,N'$ -(1,2-phenylene)diacetamide (**1**).
- **Figures S2.5-S2.7:** Fitting Curves for determination of solute concentration effect on the  $T_2$  relaxation time of buffer solution for  $N,N'$ -(1,3-phenylene)diacetamide (**2**).
- **Figures S3-S7:** (a) Overlaid z-spectra for  $N,N'$ -(1,2-phenylene)diacetamide (**1**) with changing saturation power at variable temperature (b) Omega plot for calculation of  $k_{\text{ex}}$ .
- **Figures S8-S12:** (a) Overlaid z-spectra for  $N,N'$ -(1,3-phenylene)diacetamide (**2**) with changing saturation power at variable temperature (b) Omega plot for calculation of  $k_{\text{ex}}$ .
- **Figures S13-S16:** (a) Overlaid z-spectra for  $N,N'$ -(1,2-phenylene)diacetamide (**1**) with changing saturation power at variable pH of buffer solution (b) Omega plot for calculation of  $k_{\text{ex}}$ .
- **Figures S17-S20:** (a) Overlaid z-spectra for  $N,N'$ -(1,3-phenylene)diacetamide (**2**) with changing saturation power at variable pH of buffer solution (b) Omega plot for calculation of  $k_{\text{ex}}$ .
- **Figure S21:** Overlaid z-spectra for  $N,N'$ -(1,3-phenylene)diacetamide (**2**) with varying pH ranging from 6.5-8.1.
- **Figures S22:** Plot of  $k_{\text{ex}}$  as a function of pH for  $N,N'$ -(1,2-phenylene)diacetamide (**1**)
- **Figure S23.1:** Fitting Curve for determination of  $T_1$  relaxation time constant of buffer solution.
- **Figure S23.2:** Fitting Curve for determination of  $T_1$  relaxation time constant of buffer solution having 15mM concentration of  $N,N'$ -(1,3-phenylene)diacetamide (**2**).

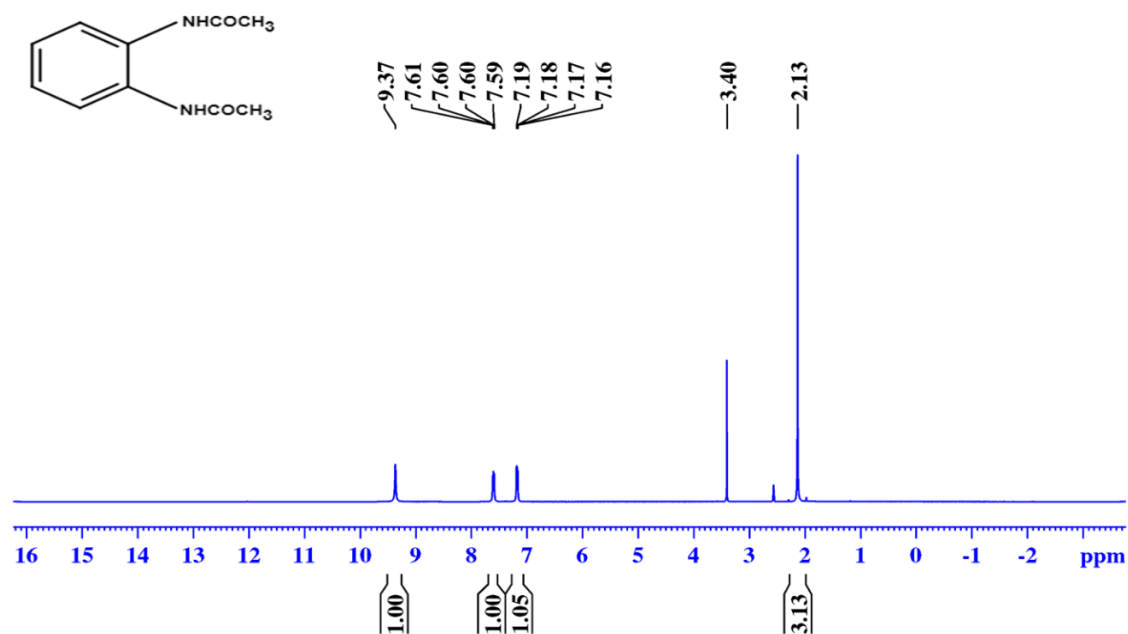

**Figure S1.1:** <sup>1</sup>H-NMR spectrum of *N,N'*-(1,2-phenylene)diacetamide (**1**) in DMSO-D<sub>6</sub>.

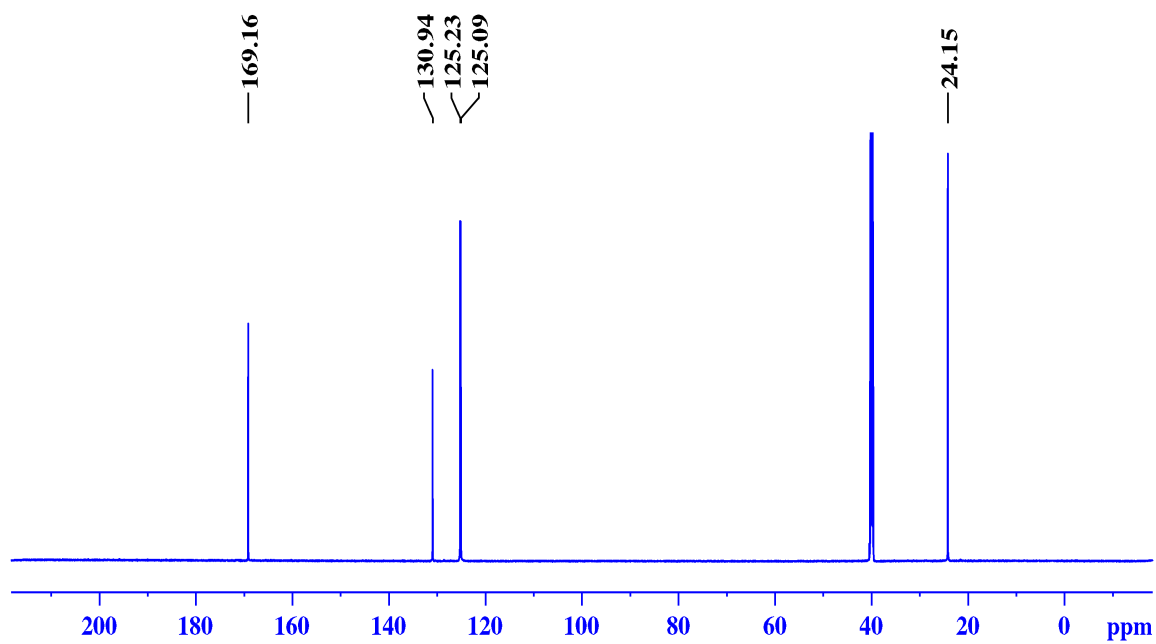

**Figure S1.2:** <sup>13</sup>C NMR spectrum of *N,N'*-(1,2-phenylene)diacetamide (**1**) in DMSO-D<sub>6</sub>.

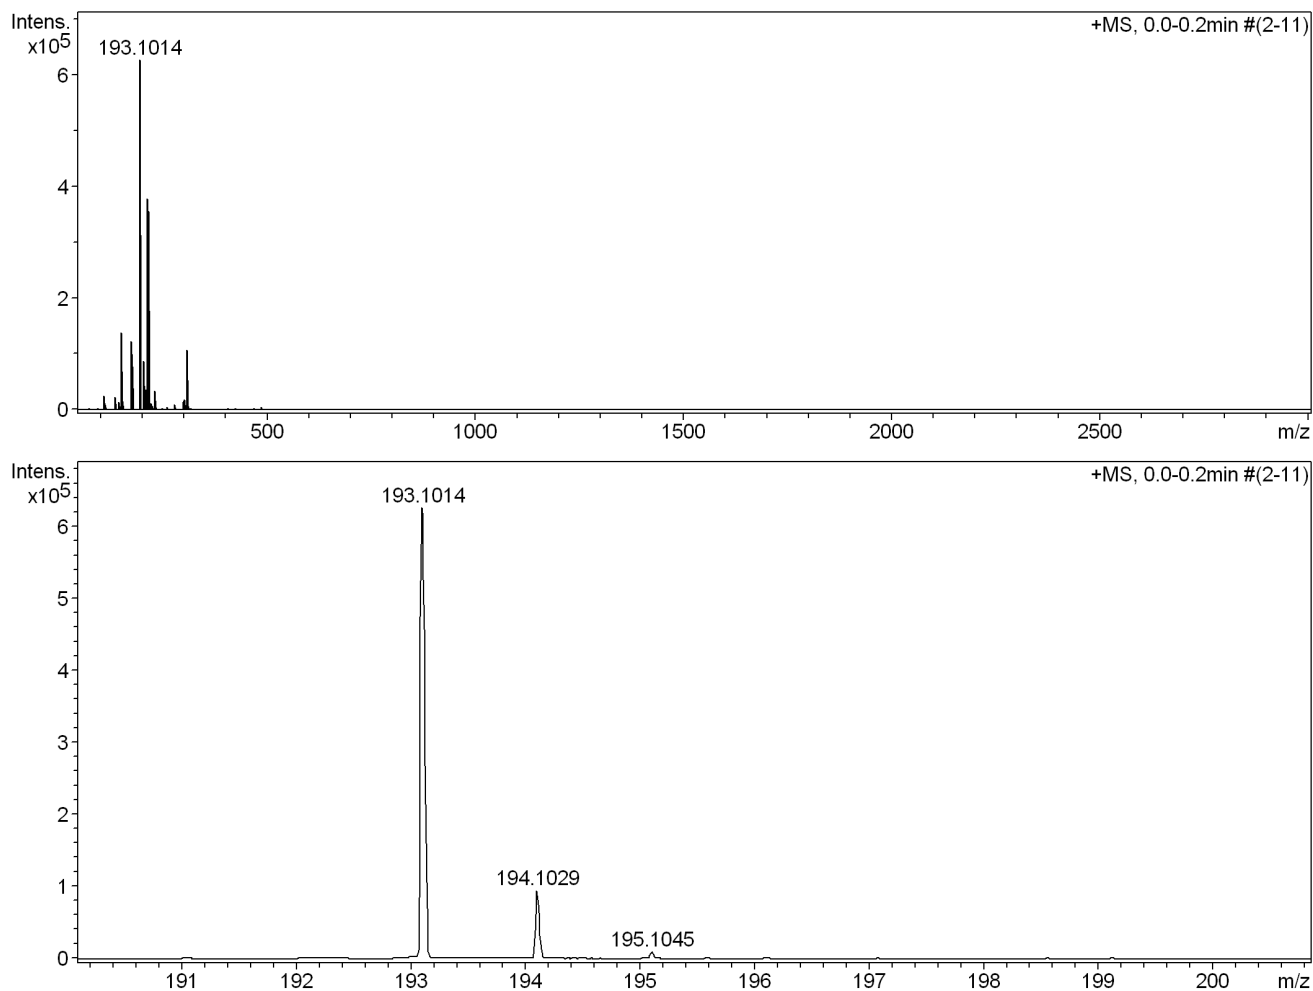

**Figure S1.3:** Expanded ESI Mass spectra of N,N'-(1,2-Phenylene)diacetamide.

**N,N'-(1,2-Phenylene)diacetamide (1):**  $^1\text{H}$  NMR (700 MHz,  $\text{DMSO-d}_6$ )  $\delta$  9.37 (s, 1H), 7.61 – 7.58 (m, 1H), 7.18 – 7.16 (m, 1H), 2.13 (s, 3H);  $^{13}\text{C}$  NMR (175 MHz,  $\text{DMSO-d}_6$ )  $\delta$  169.1, 130.9, 125.2, 125.0, 24.1. HR-MS (ESI): calculated for  $\text{C}_{10}\text{H}_{12}\text{N}_2\text{O}_2$   $[\text{M}+\text{H}]^+$ : 193.0972, found, 193.1014.

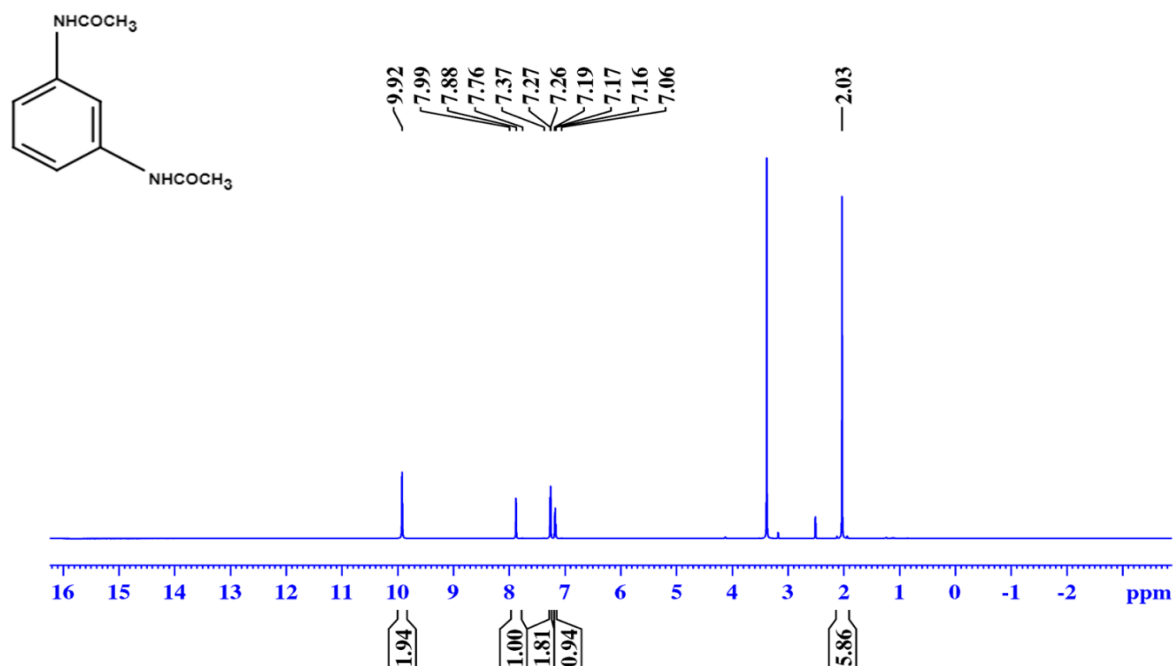

**Figure S1.4:** <sup>1</sup>H-NMR spectrum of *N,N'*-(1,3-phenylene)diacetamide (**2**) in DMSO-D<sub>6</sub>.

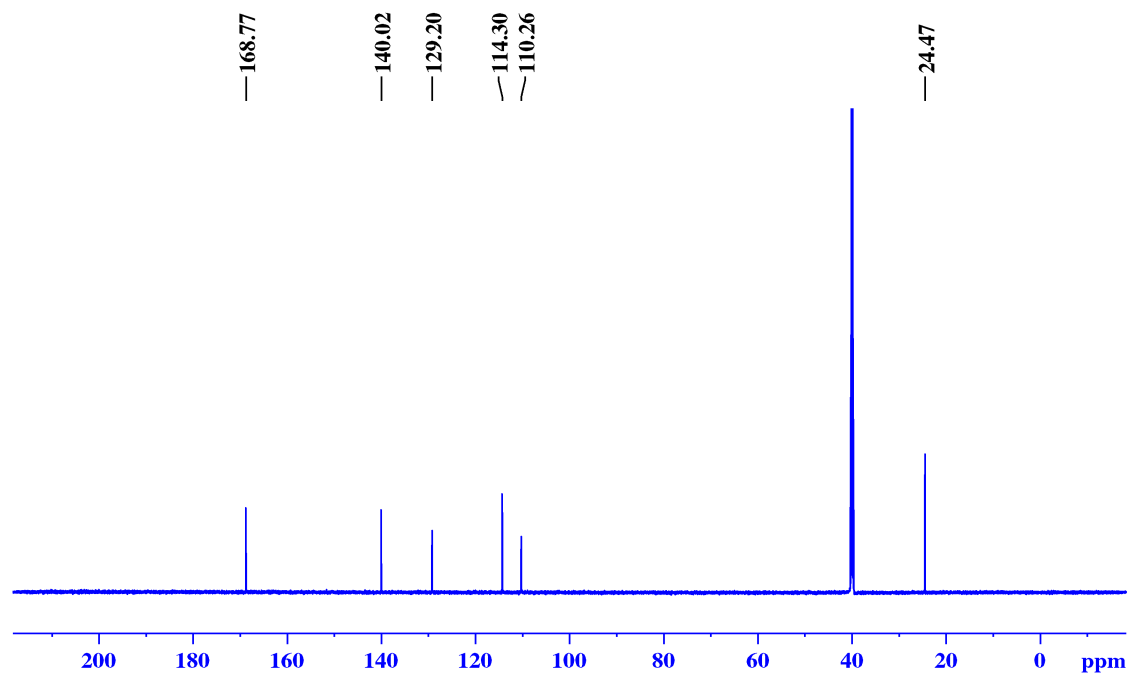

**Figure S1.5:** <sup>13</sup>C NMR spectrum of *N,N'*-(1,3-phenylene)diacetamide (**2**) in DMSO-D<sub>6</sub>.

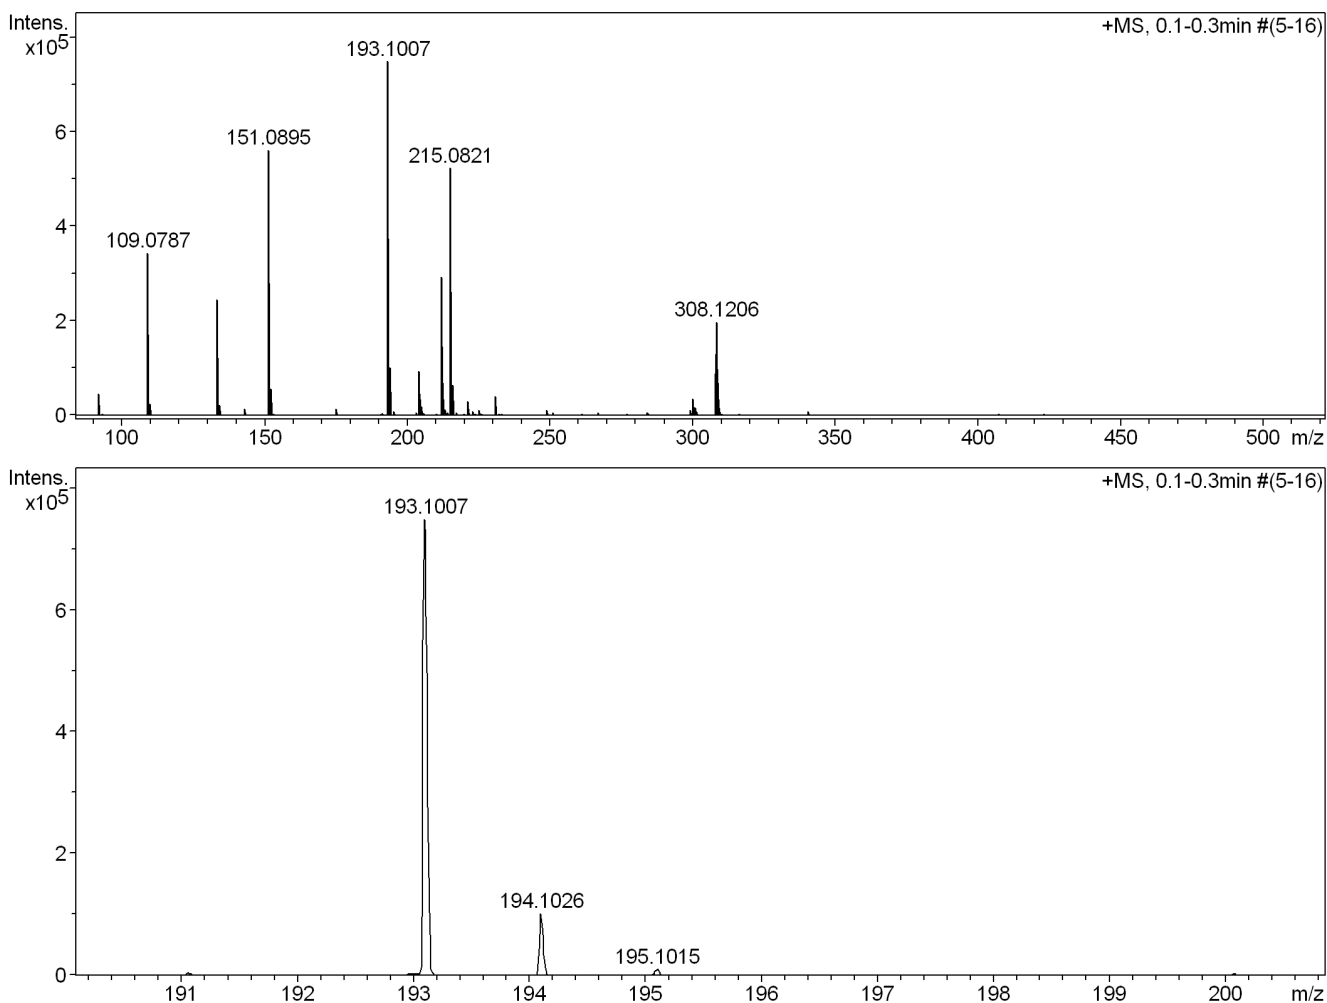

**Figure S1.6:** Expanded ESI Mass spectra of N,N'-(1,3-Phenylene)diacetamide.

**N,N'-(1,3-Phenylene)diacetamide (2):**  $^1\text{H}$  NMR (700 MHz,  $\text{DMSO-d}_6$ )  $\delta$  9.92 (s, 1H), 7.88 (s, 1H), 7.26 (d,  $J = 8.0$  Hz, 2H), 7.17 (t,  $J = 8.0$  Hz, 1H), 2.03 (s, 6H);  $^{13}\text{C}$  NMR (175 MHz,  $\text{DMSO-d}_6$ )  $\delta$  168.7, 140.0, 129.2, 114.3, 110.2, 24.4. HR-MS (ESI): calculated for  $\text{C}_{10}\text{H}_{12}\text{N}_2\text{O}_2$   $[\text{M}+\text{H}]^+$ : 193.0972, found, 193.1007.

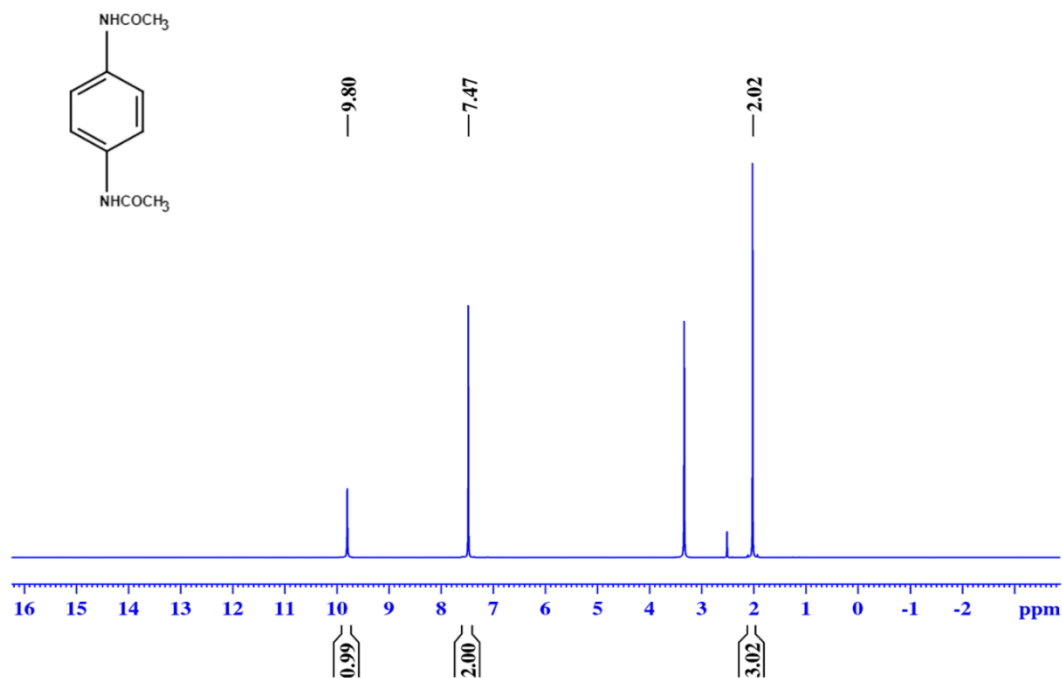

**Figure S1.7:** <sup>1</sup>H NMR spectrum of *N,N'*-(1,4-phenylene)diacetamide (**3**) in DMSO-*D*<sub>6</sub>.

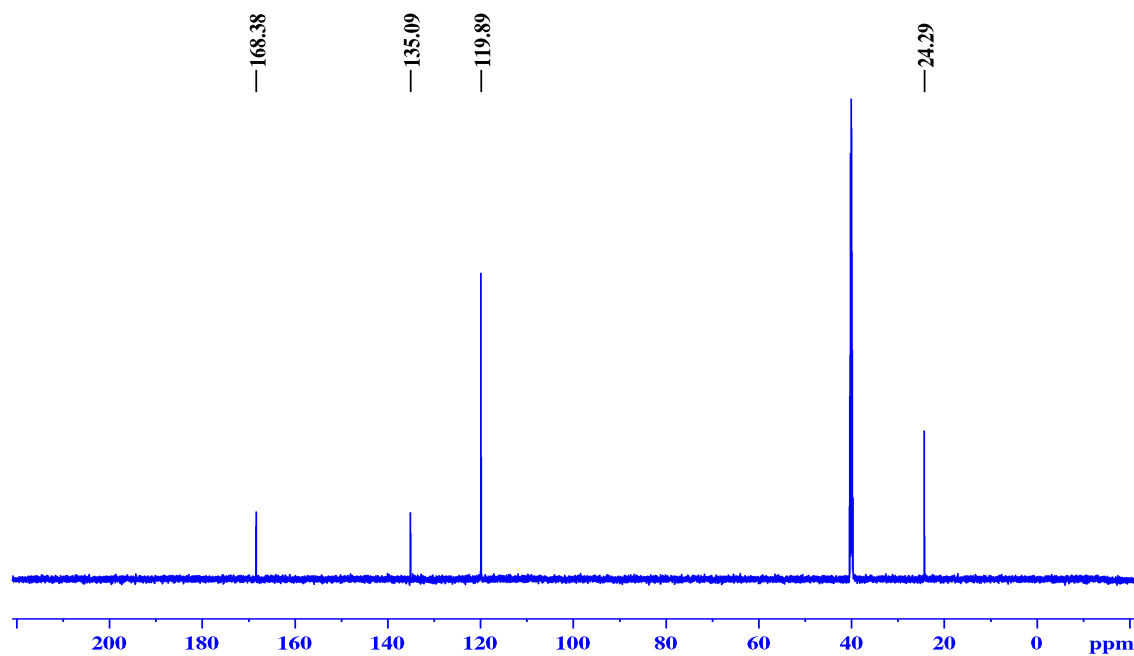

**Figure S1.8:** <sup>13</sup>C NMR spectrum of *N,N'*-(1,4-phenylene)diacetamide (**3**) in DMSO-*D*<sub>6</sub>.

***N,N'*-(1,4-Phenylene)diacetamide (3):** <sup>1</sup>H NMR (700 MHz, DMSO-*d*<sub>6</sub>) δ 9.79 (s, 1H), 7.47 (s, 2H), 2.01 (s, 3H); <sup>13</sup>C NMR (175 MHz, DMSO-*d*<sub>6</sub>) δ 169.3, 135.0, 119.8, 24.2.

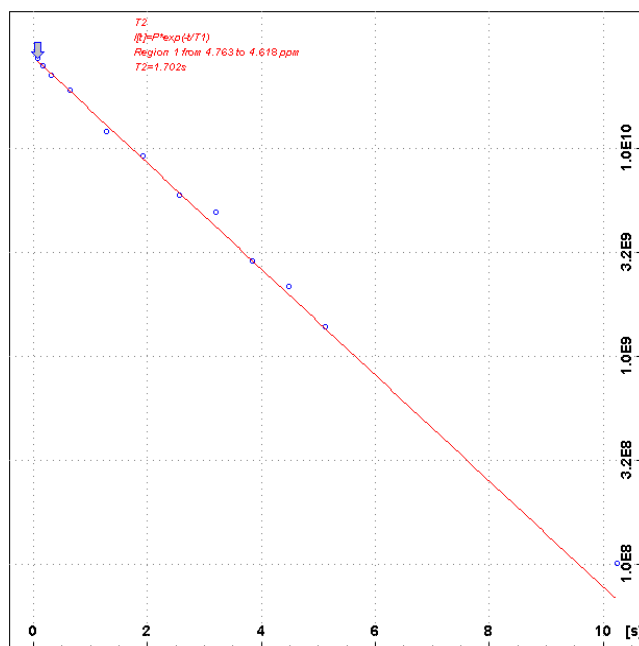

**Figure S2.0** : Logarithm of normalized water peak (at 4.7 ppm) intensity as a function of echo delay for determining the transverse relaxation of buffer solution.

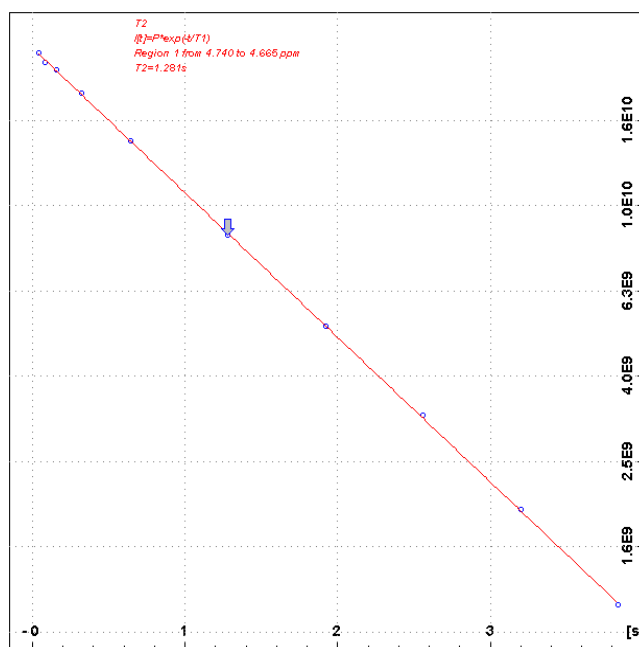

**Figure S2.1** : Logarithm of normalized water peak (at 4.7 ppm) intensity as a function of echo delay for determining the transverse relaxation of 15mM solution of **1**, in buffer.

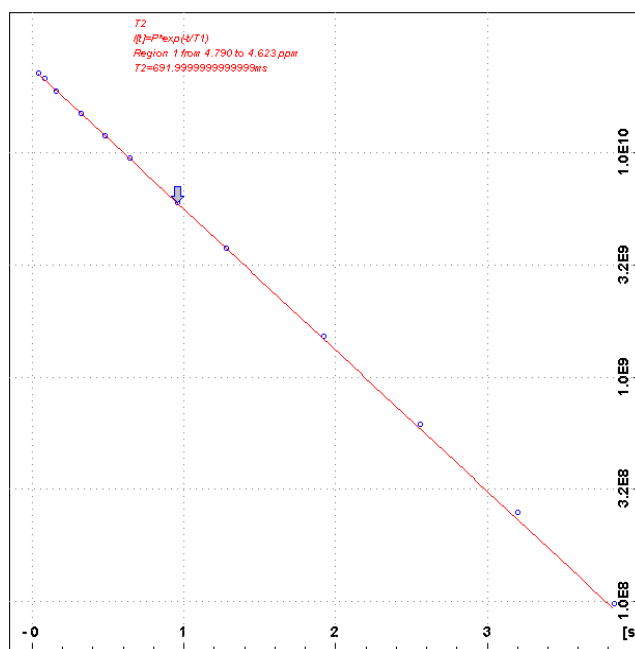

**Figure S2.2 :** Logarithm of normalized water peak (at 4.7 ppm) intensity as a function of echo delay for determining the transverse relaxation of half diluted saturated solution of **1**, in buffer.

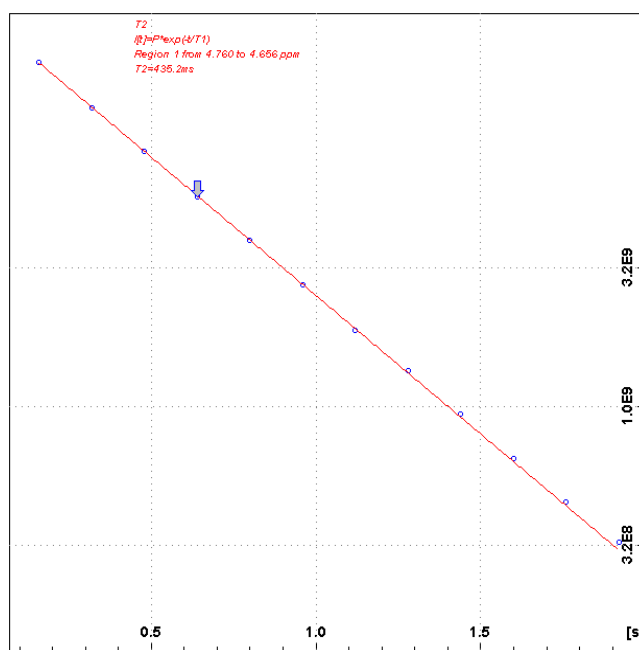

**Figure S2.3 :** Logarithm of normalized water peak (at 4.7 ppm) intensity as a function of echo delay for determining the transverse relaxation of saturated solution of **1**, in buffer.



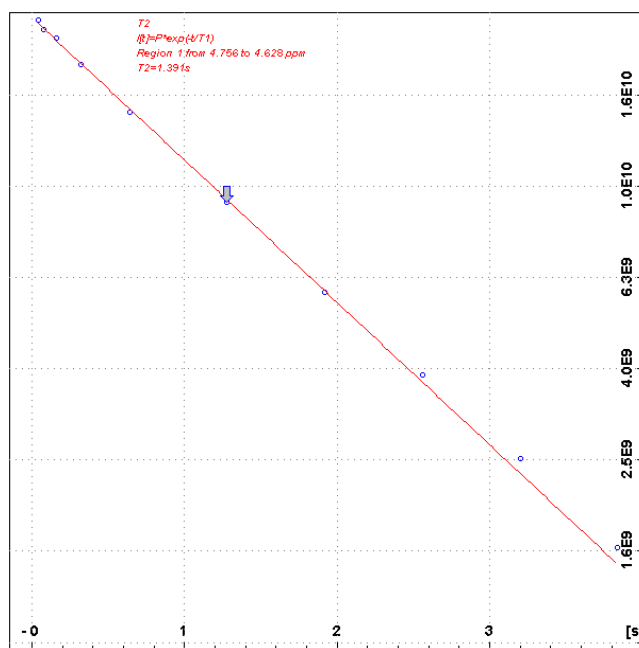

**Figure S2.4 :** Logarithm of normalized water peak (at 4.7 ppm) intensity as a function of echo delay for determining the transverse relaxation of 15mM solution of **2**, in buffer.

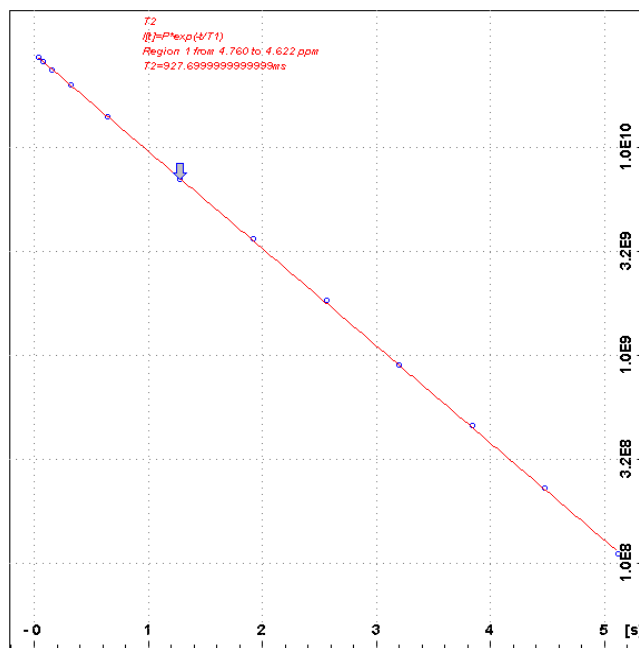

**Figure S2.5 :** Logarithm of normalized water peak (at 4.7 ppm) intensity as a function of echo delay for determining the transverse relaxation of half diluted saturated solution of **2**, in buffer.

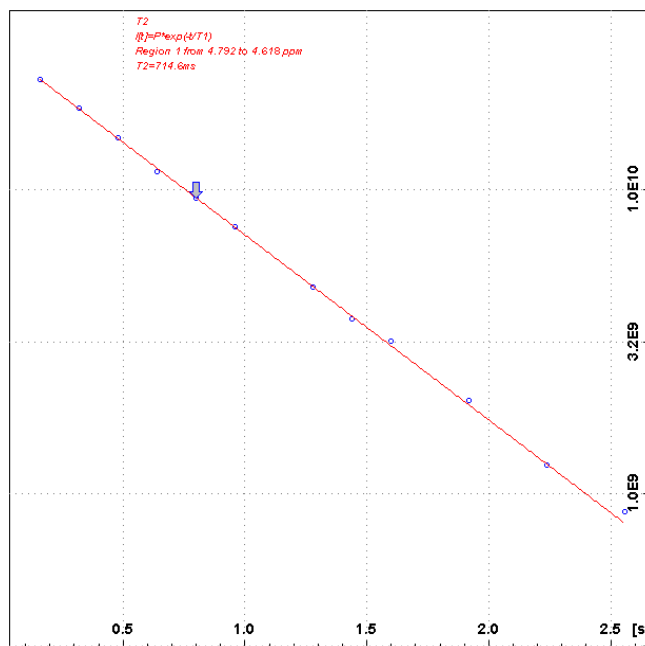

**Figure S2.6** : Logarithm of normalized water peak (at 4.7 ppm) intensity as a function of echo delay for determining the transverse relaxation of saturated solution of **2**, in buffer.

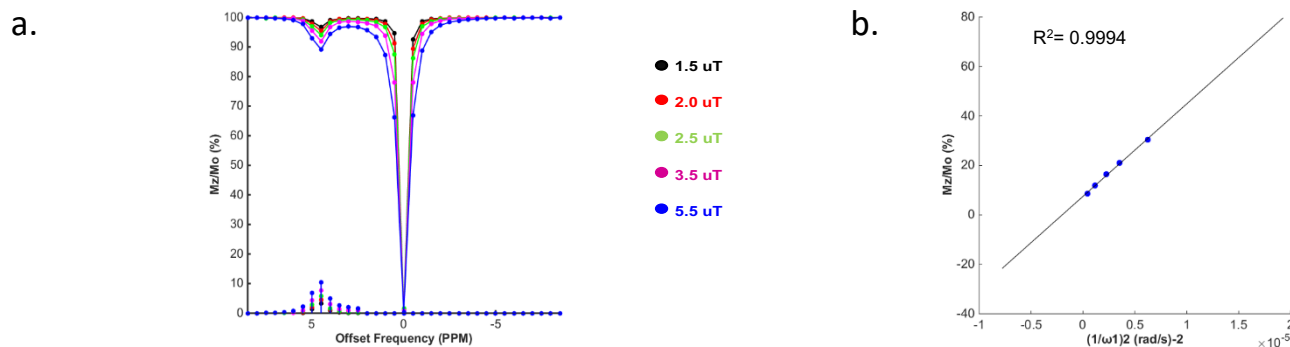

**Figure S3:** (a) Dependence of CEST percentage on saturation field strength ranging from 1.5  $\mu\text{T}$  to 5.5  $\mu\text{T}$  for *N,N'*-(1,2-phenylene)diacetamide (**1**) at 298K and pH 7.4 (b) Omega plot for exchange rate measurement. The expected linear relationship of  $M_z/(M_0 - M_z)$  as a function of  $1/\omega_1^2$  ( $\text{rad/s})^{-2} \times 10^{-5}$  was obtained when recorded at 9.4 T of 15 mM compound in 0.01M PBS buffer at pH 7.4. RF saturation pulse was applied for 6 s ensuring complete saturation

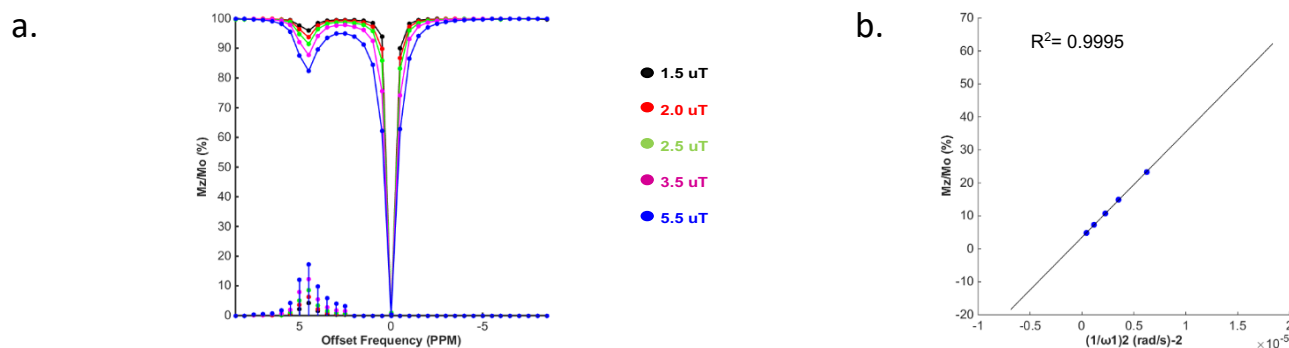

**Figure S4:** (a) Dependence of CEST percentage on saturation field strength ranging from 1.5  $\mu$ T to 5.5  $\mu$ T for *N,N'*-(1,2-phenylene)diacetamide (**1**) at 304K and pH 7.4 (b) Omega plot for exchange rate measurement. The expected linear relationship of  $M_z/(M_0-M_z)$  as a function of  $1/\omega_1^2$  (rad/sec)<sup>-2</sup> × 10<sup>-5</sup> was obtained when recorded at 9.4 T of 15 mM compound in 0.01M PBS buffer at pH 7.4. RF saturation pulse was applied for 6 s ensuring complete saturation.

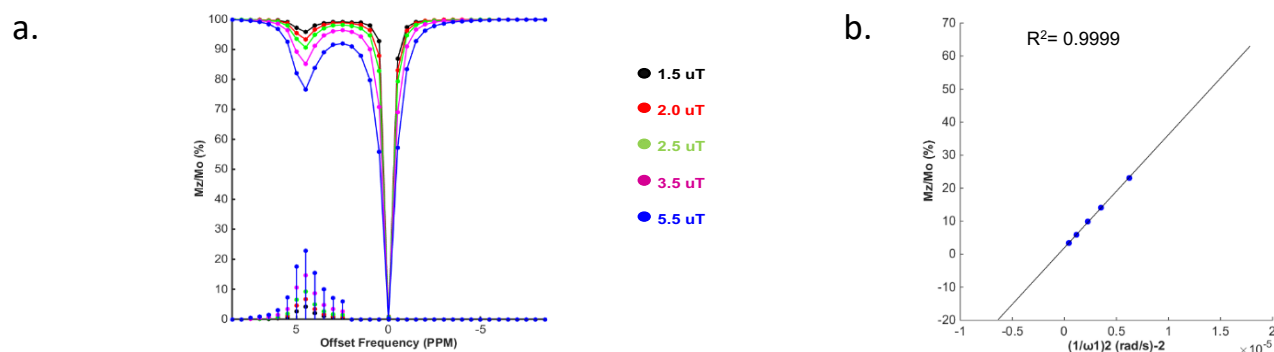

**Figure S5:** (a) Dependence of CEST percentage on saturation field strength ranging from 1.5  $\mu$ T to 5.5  $\mu$ T for *N,N'*-(1,2-phenylene)diacetamide (**1**) at 310K and pH 7.4 (b) Omega plot for exchange rate measurement. The expected linear relationship of  $M_z/(M_0-M_z)$  as a function of  $1/\omega_1^2$  (rad/sec)<sup>-2</sup> × 10<sup>-5</sup> was obtained when recorded at 9.4 T of 15 mM compound in 0.01M PBS buffer at pH 7.4. RF saturation pulse was applied for 6 s ensuring complete saturation.

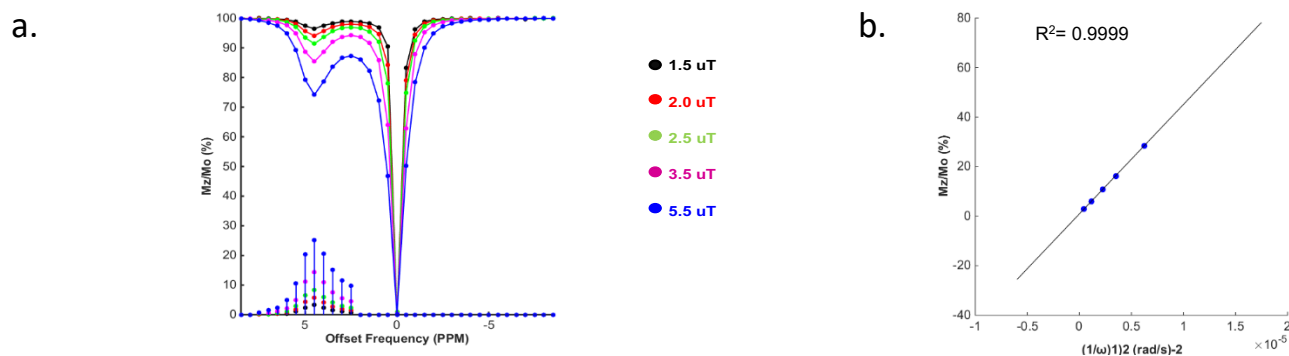

**Figure S6:** (a) Dependence of CEST percentage on saturation field strength ranging from 1.5  $\mu$ T to 5.5  $\mu$ T *N,N'*-(1,2-phenylene)diacetamide (**1**) at 316K (b) Omega plot for exchange rate measurement. The expected linear relationship of  $M_z/(M_0-M_z)$  as a function of  $1/\omega_1^2$  (rad/sec)<sup>-2</sup> × 10<sup>-5</sup> was obtained when recorded at 9.4 T of 15 mM compound in 0.01M PBS buffer at pH 7.4. RF saturation pulse was applied for 6 s ensuring complete saturation.

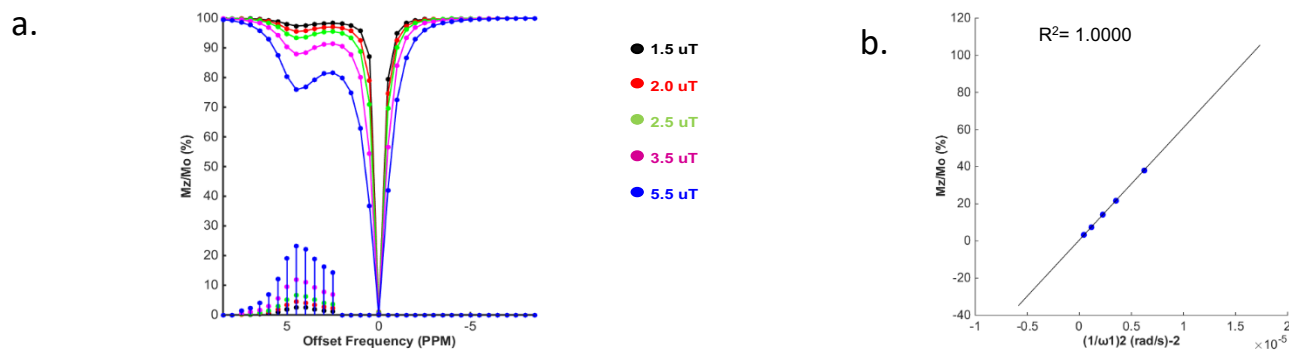

**Figure S7:** (a) Dependence of CEST percentage on saturation field strength ranging from 1.5  $\mu$ T to 5.5  $\mu$ T for  $N,N'$ -(1,2-phenylene)diacetamide (1) at 322K and pH 7.4 (b) Omega plot for exchange rate measurement. The expected linear relationship of  $M_z/(M_0-M_z)$  as a function of  $1/\omega_1^2$  (rad/sec)<sup>-2</sup>  $\times 10^{-5}$  was obtained when recorded at 9.4 T of 15 mM compound in 0.01M PBS buffer at pH 7.4. RF saturation pulse was applied for 6 s ensuring complete saturation.

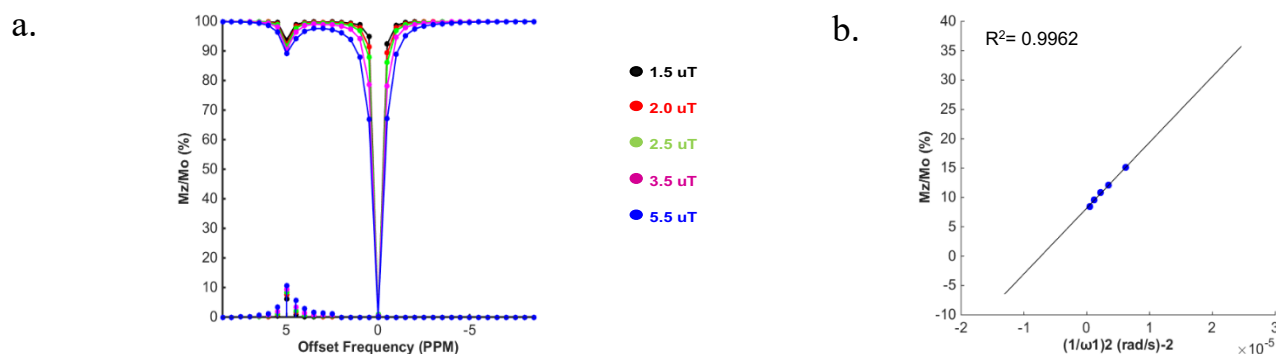

**Figure S8:** (a) Dependence of CEST percentage on saturation field strength ranging from 1.5  $\mu$ T to 5.5  $\mu$ T for  $N,N'$ -(1,3-phenylene)diacetamide (2) at 298K and pH 7.4 (b) Omega plot for exchange rate measurement. The expected linear relationship of  $M_z/(M_0-M_z)$  as a function of  $1/\omega_1^2$  (rad/sec)<sup>-2</sup>  $\times 10^{-5}$  was obtained when recorded at 9.4 T of 15 mM compound in 0.01M PBS buffer at pH 7.4. RF saturation pulse was applied for 6 s ensuring complete saturation.

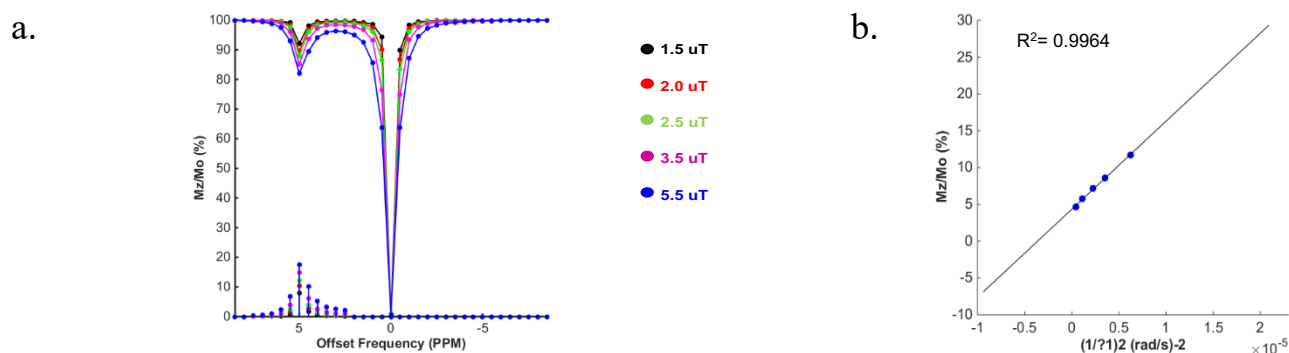

**Figure S9:** (a) Dependence of CEST percentage on saturation field strength ranging from 1.5  $\mu$ T to 5.5  $\mu$ T for  $N,N'$ -(1,3-phenylene)diacetamide (2) at 304K and pH 7.4 (b) Omega plot for exchange rate measurement. The expected linear relationship of  $M_z/(M_0-M_z)$  as a function of  $1/\omega_1^2$  (rad/sec)<sup>-2</sup>  $\times 10^{-5}$  was obtained when recorded at 9.4 T of 15 mM compound in 0.01M PBS buffer at pH 7.4. RF saturation pulse was applied for 6 s ensuring complete saturation.

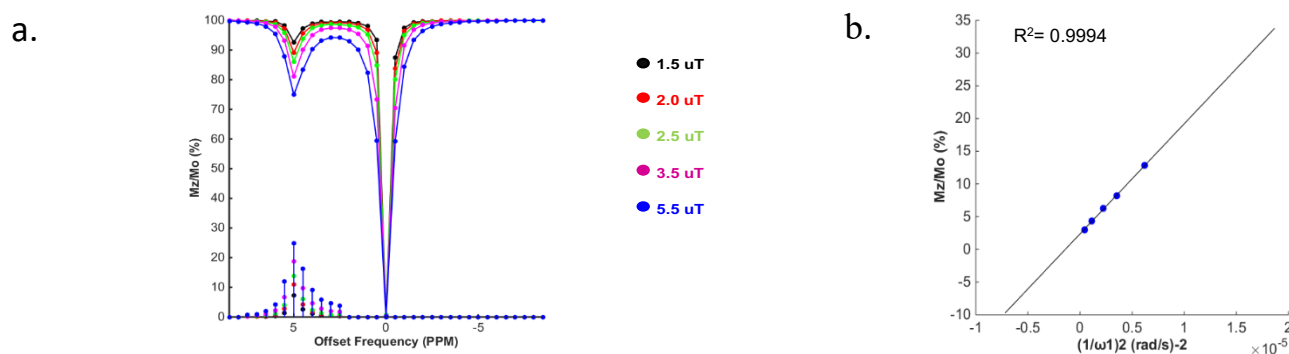

**Figure S10:** (a) Dependence of CEST percentage on saturation field strength ranging from 1.5  $\mu$ T to 5.5  $\mu$ T for *N,N'*-(1,3-phenylene)diacetamide (**2**) at 310K and pH 7.4 (b) Omega plot for exchange rate measurement. The expected linear relationship of  $M_z/(M_0-M_z)$  as a function of  $1/\omega_1^2$  (rad/sec)<sup>-2</sup> × 10<sup>-5</sup> was obtained when recorded at 9.4 T of 15 mM compound in 0.01M PBS buffer at pH 7.4. RF saturation pulse was applied for 6 s ensuring complete saturation.

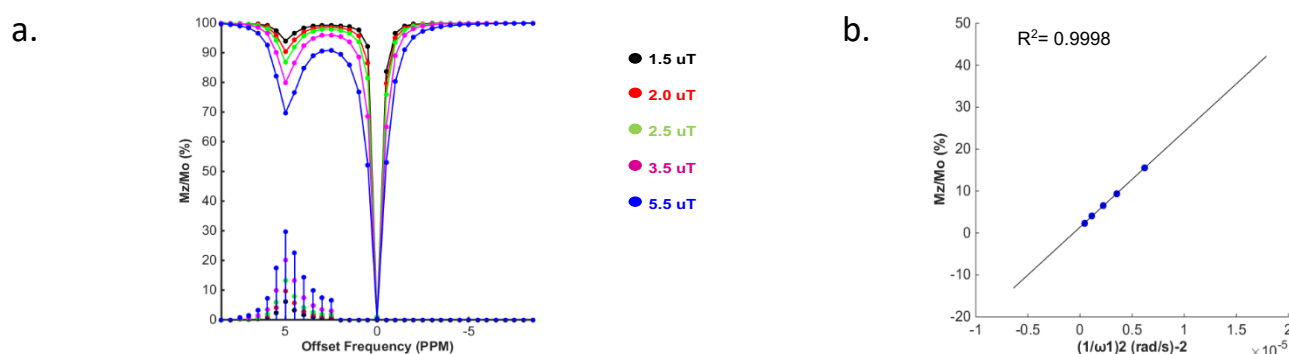

**Figure S11:** (a) Dependence of CEST percentage on saturation field strength ranging from 1.5  $\mu$ T to 5.5  $\mu$ T for *N,N'*-(1,3-phenylene)diacetamide (**2**) at 316K (b) Omega plot for exchange rate measurement. The expected linear relationship of  $M_z/(M_0-M_z)$  as a function of  $1/\omega_1^2$  (rad/sec)<sup>-2</sup> × 10<sup>-5</sup> was obtained when recorded at 9.4 T of 15 mM compound in 0.01M PBS buffer at pH 7.4. RF saturation pulse was applied for 6 s ensuring complete saturation.

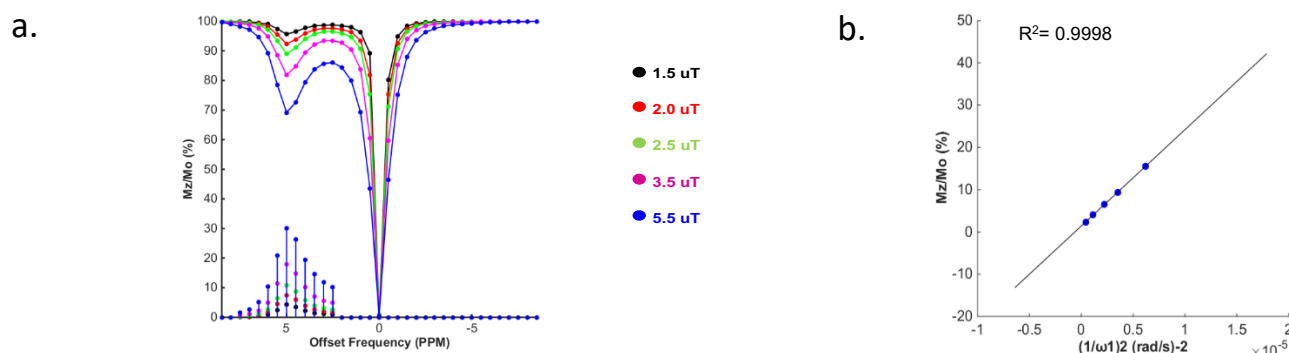

**Figure S12:** (a) Dependence of CEST percentage on saturation field strength ranging from 1.5  $\mu$ T to 5.5  $\mu$ T for *N,N'*-(1,3-phenylene)diacetamide (**2**) at 322K and pH 7.4 (b) Omega plot for exchange rate measurement. The expected linear relationship of  $M_z/(M_0-M_z)$  as a function of  $1/\omega_1^2$  (rad/sec)<sup>-2</sup> × 10<sup>-5</sup> was obtained when recorded at 9.4 T of 15 mM compound in 0.01M PBS buffer at pH 7.4. RF saturation pulse was applied for 6 s ensuring complete saturation.

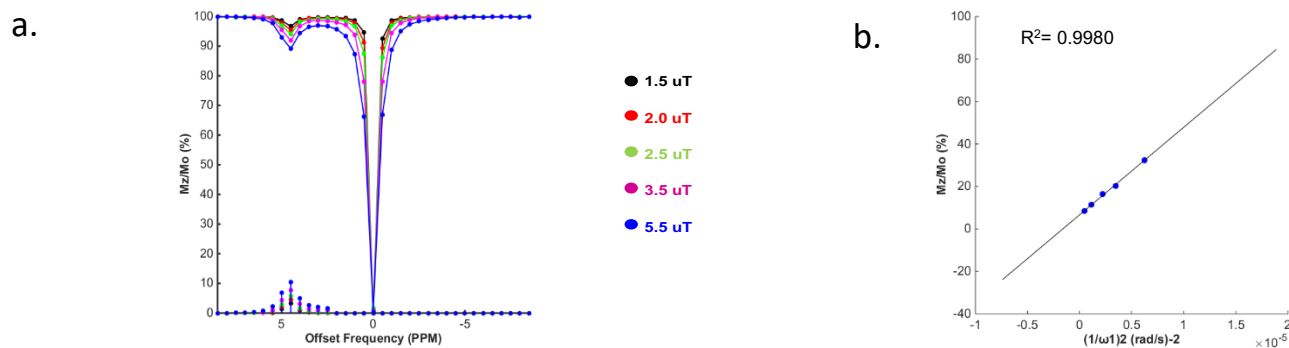

**Figure S13:** (a) Dependence of CEST percentage on saturation field strength ranging from 1.5  $\mu$ T to 5.5  $\mu$ T for *N,N'*-(1,2-phenylene)diacetamide (**1**) at 310K and pH 6.5 (b) Omega plot for exchange rate measurement. The expected linear relationship of  $M_z/(M_0-M_z)$  as a function of  $1/\omega_1^2$  (rad/sec)<sup>-2</sup> × 10<sup>-5</sup> was obtained when recorded at 9.4 T of 15 mM compound in 0.01M PBS buffer at pH 6.5. RF saturation pulse was applied for 6 s ensuring complete saturation.

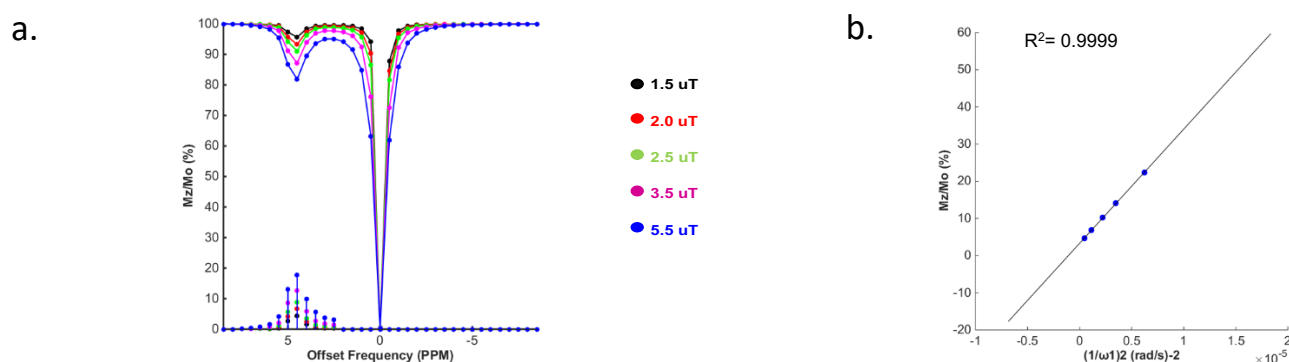

**Figure S14:** (a) Dependence of CEST percentage on saturation field strength ranging from 1.5  $\mu$ T to 5.5  $\mu$ T for *N,N'*-(1,2-phenylene)diacetamide (**1**) at 310K and pH 7.0 (b) Omega plot for exchange rate measurement. The expected linear relationship of  $M_z/(M_0-M_z)$  as a function of  $1/\omega_1^2$  (rad/sec)<sup>-2</sup> × 10<sup>-5</sup> was obtained when recorded at 9.4 T of 15 mM compound in 0.01M PBS buffer at pH 7.0. RF saturation pulse was applied for 6 s ensuring complete saturation.

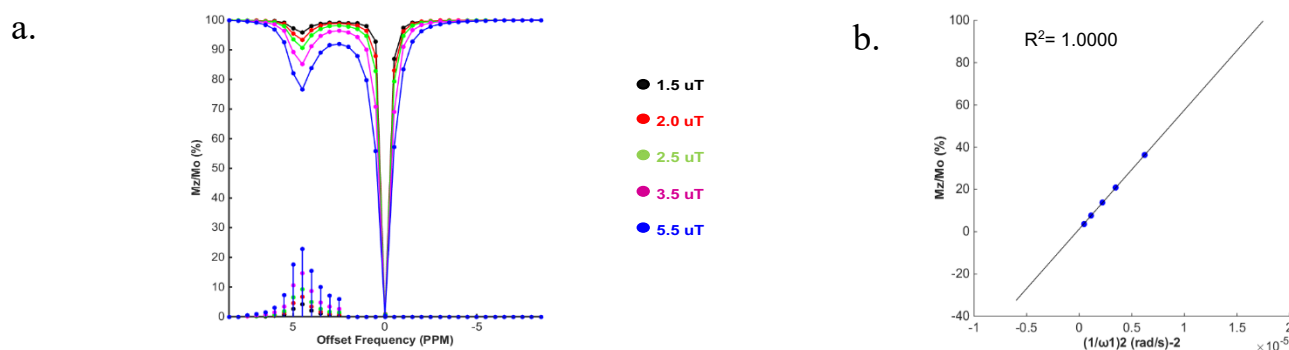

**Figure S15:** (a) Dependence of CEST percentage on saturation field strength ranging from 1.5  $\mu$ T to 5.5  $\mu$ T for *N,N'*-(1,2-phenylene)diacetamide (**1**) at 310K and pH 7.4 (b) Omega plot for exchange rate measurement. The expected linear relationship of  $M_z/(M_0-M_z)$  as a function of  $1/\omega_1^2$  (rad/sec)<sup>-2</sup> × 10<sup>-5</sup> was obtained when recorded at 9.4 T of 15 mM compound in 0.01M PBS buffer at pH 7.4. RF saturation pulse was applied for 6 s ensuring complete saturation.

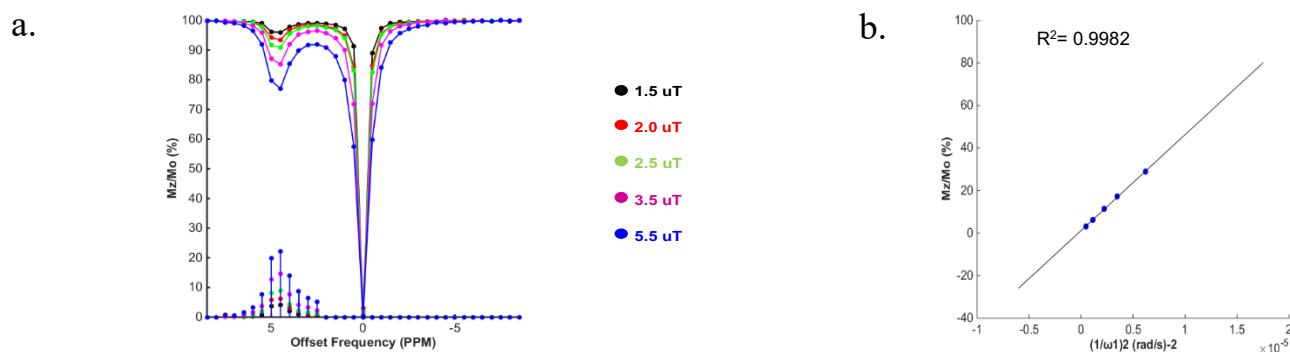

**Figure S16:** (a) Dependence of CEST percentage on saturation field strength ranging from 1.5  $\mu$ T to 5.5  $\mu$ T for  $N,N'$ -(1,2-phenylene)diacetamide (1) at 310K and pH 8.1 (b) Omega plot for exchange rate measurement. The expected linear relationship of  $M_z/(M_0-M_z)$  as a function of  $1/\omega_1^2$  (rad/sec) $^{-2} \times 10^{-5}$  was obtained when recorded at 9.4 T of 15 mM compound in 0.01M PBS buffer at pH 8.1. RF saturation pulse was applied for 6 s ensuring complete saturation.

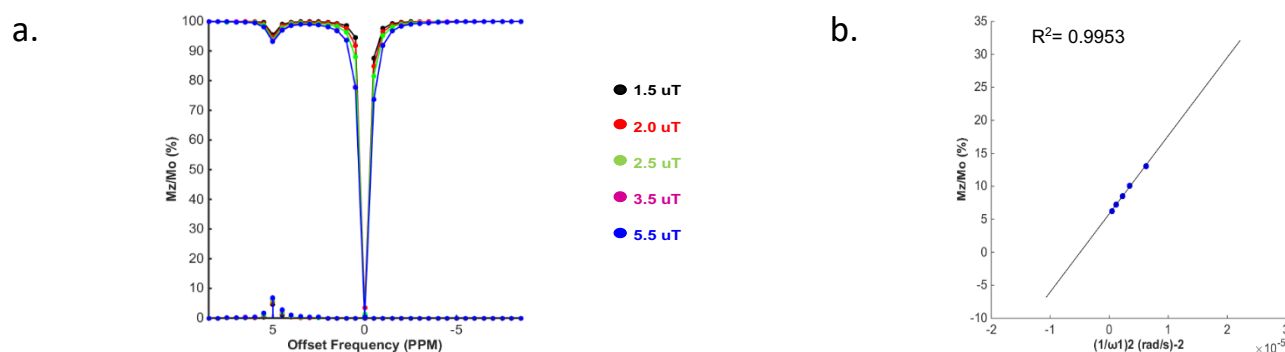

**Figure S17:** (a) Dependence of CEST percentage on saturation field strength ranging from 1.5  $\mu$ T to 5.5  $\mu$ T for  $N,N'$ -(1,3-phenylene)diacetamide (2) at 310K and pH 6.5 (b) Omega plot for exchange rate measurement. The expected linear relationship of  $M_z/(M_0-M_z)$  as a function of  $1/\omega_1^2$  (rad/sec) $^{-2} \times 10^{-5}$  was obtained when recorded at 9.4 T of 15 mM compound in 0.01M PBS buffer at pH 6.5. RF saturation pulse was applied for 6 s ensuring complete saturation.

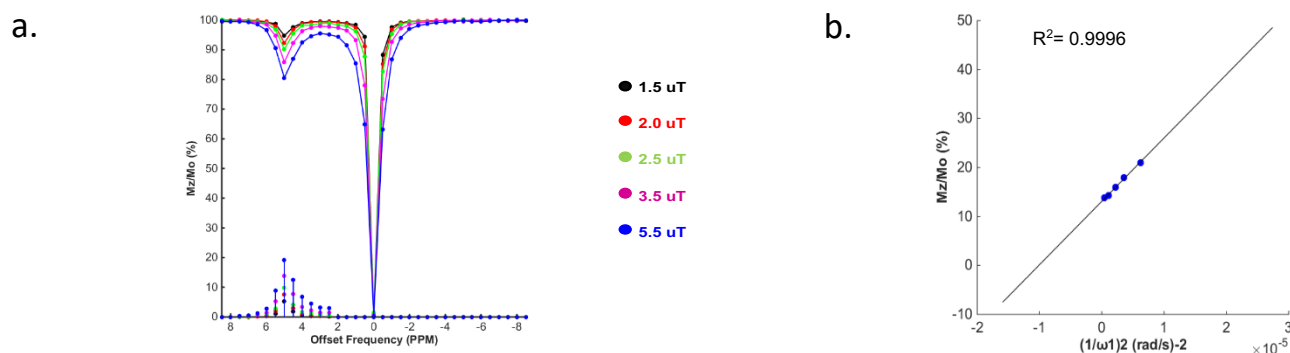

**Figure S18:** (a) Dependence of CEST percentage on saturation field strength ranging from 1.5  $\mu$ T to 5.5  $\mu$ T for  $N,N'$ -(1,3-phenylene)diacetamide (2) at 310K and pH 7.0 (b) Omega plot for exchange rate measurement. The expected linear relationship of  $M_z/(M_0-M_z)$  as a function of  $1/\omega_1^2$  (rad/sec) $^{-2} \times 10^{-5}$  was obtained when recorded at 9.4 T of 15 mM compound in 0.01M PBS buffer at pH 7.0. RF saturation pulse was applied for 6 s ensuring complete saturation.

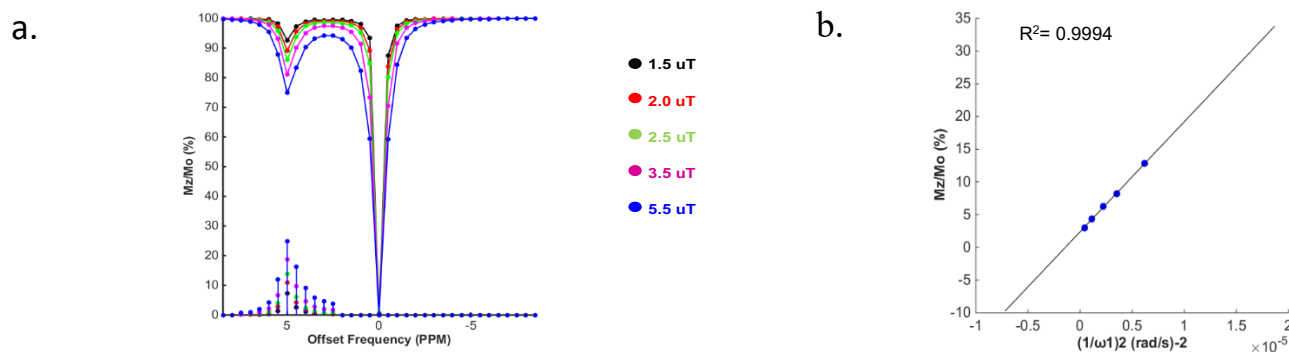

**Figure S19:** (a) Dependence of CEST percentage on saturation field strength ranging from 1.5  $\mu$ T to 5.5  $\mu$ T for *N,N'*-(1,3-phenylene)diacetamide (**2**) at 310K and pH 7.4 (b) Omega plot for exchange rate measurement. The expected linear relationship of  $M_z/(M_0-M_z)$  as a function of  $1/\omega_1^2$  (rad/sec)<sup>-2</sup> × 10<sup>-7</sup> was obtained when recorded at 9.4 T of 15 mM compound in 0.01M PBS buffer at pH 7.4. RF saturation pulse was applied for 6 s ensuring complete saturation.

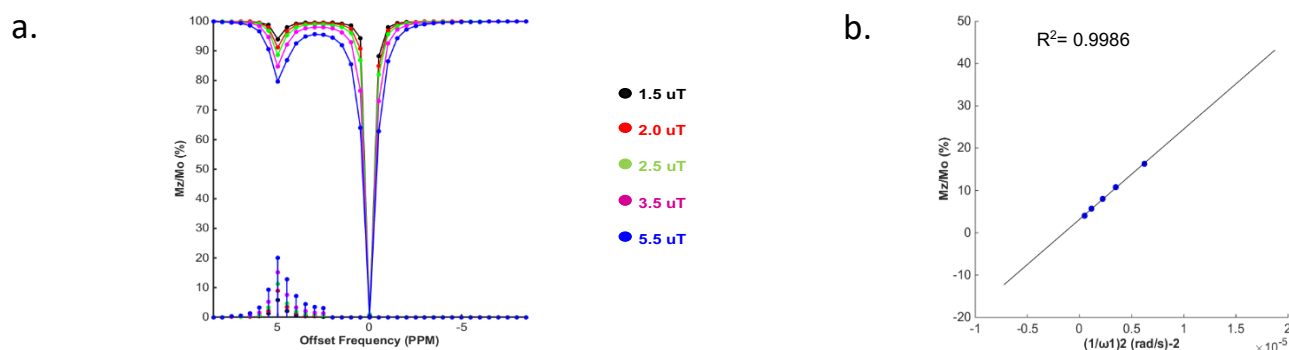

**Figure S20:** (a) Dependence of CEST percentage on saturation field strength ranging from 1.5  $\mu$ T to 5.5  $\mu$ T *N,N'*-(1,3-phenylene)diacetamide (**2**) at 310K and pH 8.1 (b) Omega plot for exchange rate measurement. The expected linear relationship of  $M_z/(M_0-M_z)$  as a function of  $1/\omega_1^2$  (rad/sec)<sup>-2</sup> × 10<sup>-7</sup> was obtained when recorded at 9.4 T of 15 mM compound in 0.01M PBS buffer at pH 8.1. RF saturation pulse was applied for 6 s ensuring complete saturation.

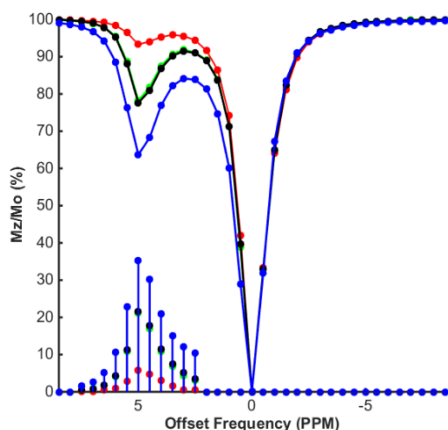

**Figure S21:** Dependence of CEST effect of *N,N'*-(1,3-phenylene)diacetamide (**2**) on pH. Overlaid Z-spectra with pH ranging from 6.5 to 8.1, RF saturation of 5  $\mu$ T was applied for 3s to obtain the z-spectra.



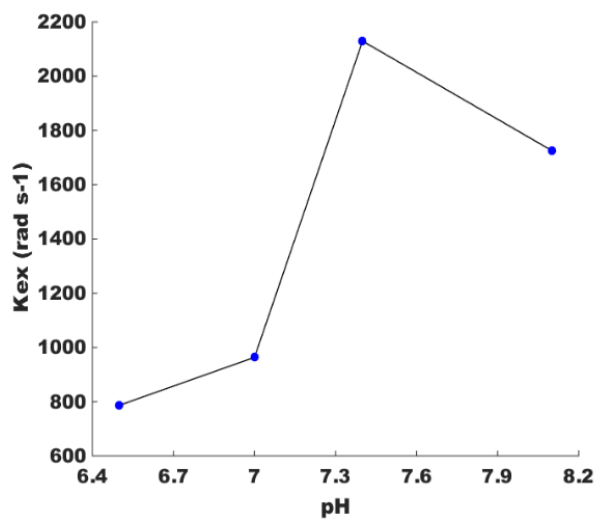

**Figure S22:** Dependence of  $k_{ex}$  for **1**, as a function of pH of buffer solution.

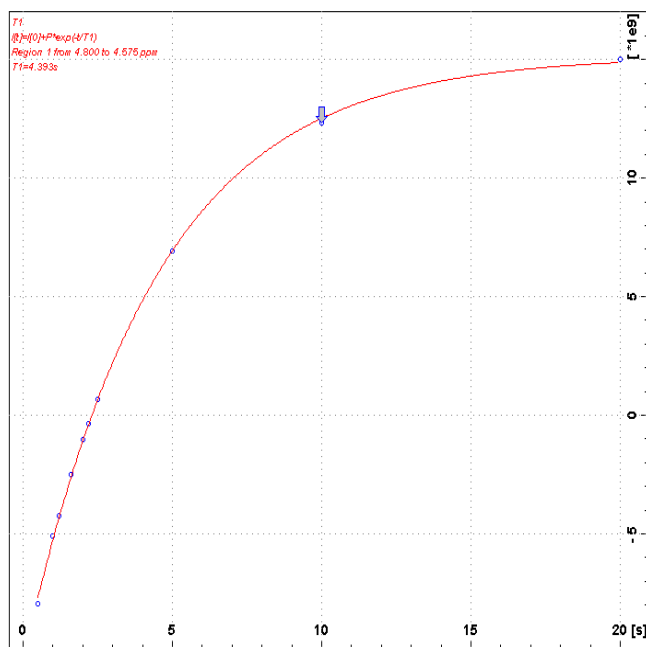

**Figure S23.1:** Normalized water peak (at 4.7 ppm) intensity as a function of relaxation delay for determining the longitudinal relaxation time constant of water in normal PBS buffer solution.

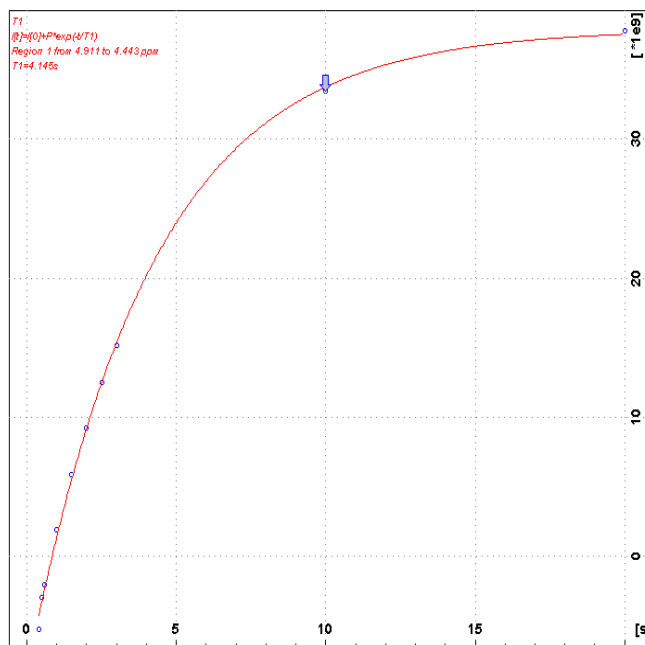

**Figure S23.2:** Normalized water peak (at 4.7 ppm) intensity as a function of relaxation delay for determining the longitudinal relaxation time constant of water in 15mM solution of **2** in PBS buffer.
